# Supplementary material for: Ligase-assisted signal-amplifiable DNA detection using upconversion nanoparticles
Source: Royal Society of Chemistry journal article supplement (doi:10.1039/c3ra42421a), 2013-01-01
Supplement: c3ra42421a.pdf [file c3ra42421a.pdf]

# Ligase-assisted signal-amplifiable DNA detection using upconversion nanoparticles

Peng Wang, Tevhide Ozkaya Ahmadov, Changwon Lee and Peng Zhang

## Supporting Information

### Chemicals and materials

$Y(NO_3)_3 \cdot 6H_2O$ ,  $Yb(NO_3)_3 \cdot 5H_2O$ ,  $Tm(NO_3)_3 \cdot 5H_2O$ , polyacrylic acid (PAA, MW ~15000), NaOH,  $NH_4F$ , ethylenediaminetetraacetic acid (EDTA) and acetone were purchased from Sigma (St. Louis, MO). SYBR Green I was purchased from Life Technology (Carlsbad, CA). Ethylene glycol (EG), 1-Ethyl-3-[3-dimethylammonopropyl]carbodiimide hydrochloride (EDC) and N-hydroxysuccinimide (NHS) were purchased from Thermo Scientific (Rockford, IL).

Single-stranded DNA fragments were ordered from IDT DNA (Coralville, IA). The sequences were DNA\_seg1 (5' amino-CAG TAA CGG CAG A-3') amine-modified at the 5'-end, DNA\_seg2 (5'-CTT CTC CAC AGG AGC CGT TAC TG-3') phosphorylated at the 5'-end, DNA\_tar (5'-TCC TGT GGA GAA GTC TGC CGT TAC TG-3'), and DNA\_mut (5'-TCC TGA GGA GAA GTC TGC CGT TAC TG-3'). Thermostable DNA ligase (Ampligase®) and 10x Ampligase® reaction buffer were purchased from Epicentre (Madison, WI). The melting points of various DNA strands were calculated using the OligoAnalyzer 3.1 program available at the vendor website ([www.idtdna.com](http://www.idtdna.com)).

### Synthesis of $NaYF_4:Yb^{3+},Tm^{3+}$ upconversion nanoparticles

PAA (0.3 g), NaCl (23.4 mg),  $YCl_3$  (48.5 mg),  $YbCl_3$  (13.9 mg), and  $TmCl_3$  (1.1 mg) were added into 3 ml EG, using vortex and sonicator to make the mixture homogenous (Solution A). Separately, 0.03 g of

NH<sub>4</sub>F was added to 2 mL of EG in a Teflon container (Solution B). Solution A was added drop wise into Solution B under stirring. The Teflon container was then placed in a sealed, stainless-steel capsule, and incubated for 2 hr at 200 °C. The resulting solution was clear with light yellow in color. The nanoparticles were collected after centrifuging the solution for 1 hr at 15,000 rpm to remove the supernatant. They were washed 3 times by ethanol and twice by DI water, before dispersed in 2 ml DI water for storage.

### **Conjugation of DNA\_seg1 to UCNPs**

Two mL of washed UCNP aqueous solution was pre-treated with 10 μL of EDC (0.2 M) and 10 μL of NHS (0.05 M) for 5 min under stirring at 8000 rpm. Then, 30 μL of 100 μM DNA\_seg1 was added into the reaction mixture and stirred at 8000 rpm overnight. The resulting nanoparticles were washed 3 times by DI water, before dispersed in 500 μL DI water.

### **Ligation and hairpin loop amplification in thermal cycles**

Fifty μL of DNA\_seg1 conjugated UCNP solution was mixed with 10 μL of 10× Ampligase® reaction buffer, 20 μL of 1 μM DNA\_seg2 and 1 μL of Ampligase with different amounts of 0.1 μM DNA\_tar. The solution of a total volume of 100 μL was then treated in 90 °C for 30 second. Then the solution was cooled down to 72 °C and maintained for 1 min. At last the solution was cooled down to 45°C and maintained for 3 min. This thermal cycle was repeated up to 20 times.

### **TEM measurement**

TEM samples were prepared by air-drying a drop of the sample solution on a 300-mesh Formvar-covered carbon-coated copper grid (Electron Microscopy Sciences, PA). TEM observations were performed using a Biotwin 12 transmission electron microscope (FEI, Netherlands). The images were analyzed by ImageJ software. The UCNPs were relatively mono-dispersed with the diameter of 143 ± 19 nm after analyzing 712 particles.

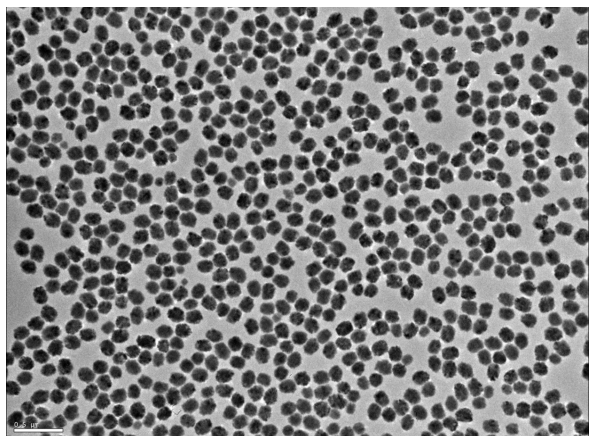

Figure S1. TEM picture of  $\text{NaYF}_4:\text{Yb}^{3+},\text{Tm}^{3+}$  upconversion nanoparticles (Scale bar: 500 nm).

### **FTIR measurement**

Surface functional group characterization was performed on an ATR cell (Nicolet 6700 FT-IR, Fisher Thermo Scientific).

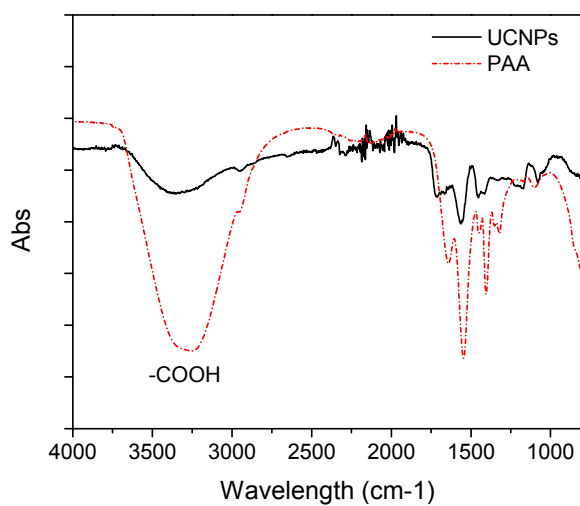

Figure S2. FT-IR spectra of  $\text{NaYF}_4:\text{Yb}^{3+},\text{Tm}^{3+}$  upconversion nanoparticles and PAA.

### Determination of the amount of UCNP-conjugated DNA\_seg1

First, a calibration curve of DNA\_seg1 in 5  $\mu$ M SG1 solution was obtained with different concentrations (0, 50, 100, 200, 400 nM) of DNA\_seg1 (Figure S3B). The calibration curve showed a linear relationship between the fluorescence intensity of SG1 and the concentration of DNA\_seg1 (in nM). Then 25  $\mu$ L of UCNP-conjugated DNA\_seg1 working solution was diluted by 20 times, and then mixed with 5  $\mu$ M SG1 solution. The fluorescence intensity of SG1 at 530 nm was again measured, and compared to the calibration curve, yielding 220 nM of DNA\_seg1 for the 500  $\mu$ L of diluted solution. For these measurements (Figure S3A), SG1 was excited at 480 nm using a Xenon lamp with the slit width of 1 mm.

Based on these results, we were also able to calculate the yield of the EDC/NHS conjugation between UCNPs and DNA\_seg1. The initial amount of DNA\_seg1 added during the conjugation was 3 nmole. The conjugation yield was thus ~73%.

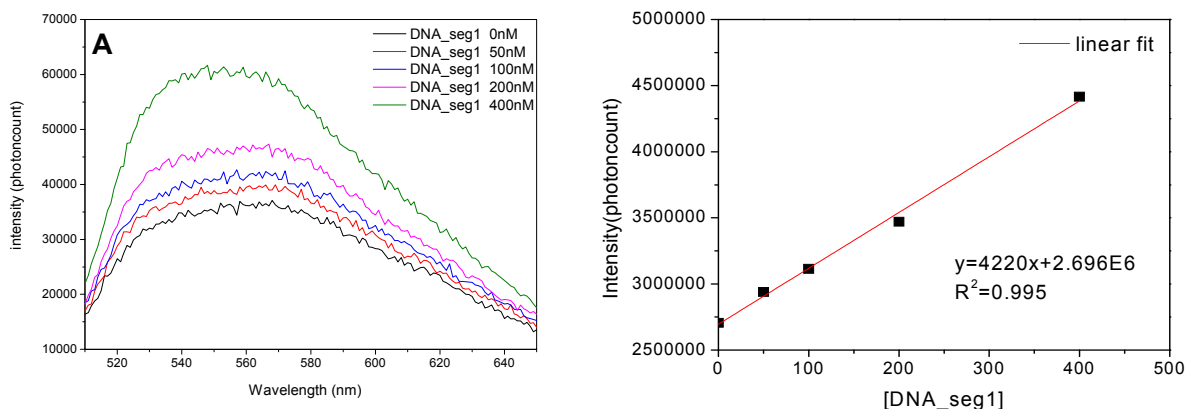

Figure S3. SG1 fluorescence emission excited at 490 nm with different amounts of DNA\_seg1 (A), and a calibration curve (B).

### Luminescence measurement at 980 nm excitation

One hundred  $\mu$ L of UCNP-DNA\_seg1 mixture after respective thermal cycles was mixed with 50  $\mu$ L of 0.1 M EDTA solution for 30 min, and washed twice by DI water before dispersed in 200  $\mu$ L DI water.

The solution was then mixed with 200  $\mu\text{L}$  of 37  $\mu\text{M}$  SG1 solution in 100  $\mu\text{M}$  sodium phosphate buffer solution (pH 7.8). The solution was placed in a quartz cuvette and put in the cuvette holder of the spectrofluorometer (Photon Technology International, NJ), which is equipped with a customized excitation source of a 980-nm laser (Laserglow Technology, Toronto). Emission signals were measured with a slit width of 10 nm.

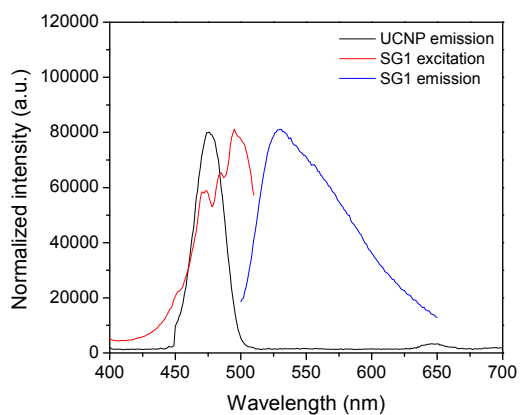

Figure S4. Normalized excitation and emission spectra of SG1 and emission spectrum of  $\text{NaYF}_4:\text{Yb}^{3+}$ ,  $\text{Tm}^{3+}$  upconversion nanoparticles excited at 980 nm.
